# Supplementary material for: Differential expression of six genes in fat-type Hungarian Mangalica and other pigs
Source: Copernicus journal article supplement (doi:10.5194/aab-59-259-2016), 2016-06-14
Supplement: Supplementary file 1 [file aab-59-259-2016-supplement.pdf]

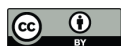

*Supplement of*

## **Differential expression of six genes in fat-type Hungarian Mangalica and other pigs**

Károly Tempfli et al.

*Correspondence to:* Károly Tempfli ([tempfli.karoly@sze.hu](mailto:tempfli.karoly@sze.hu))

The copyright of individual parts of the supplement might differ from the CC-BY 3.0 licence.

**Figure S1.** Agarose gel electropherograms of total RNA isolated from the experimental animals. Only isolates with visible ribosomal bands were subjected to further procedures, degraded samples (e.g. muscle sample 8) were omitted

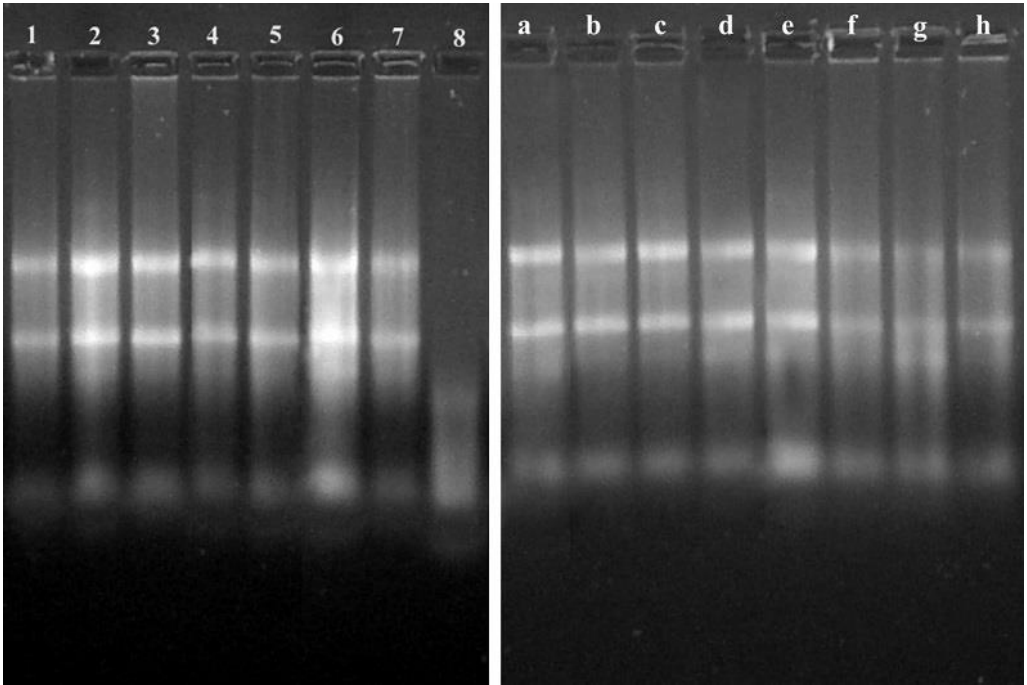

1-8: muscle isolations (1-2: MAN; 3-4: MD; 5-6: HLW; 7-8: PD); a-h: backfat isolations (a-b: MAN; c-d: MD; e-f: HLW; g-  
5 h: PD)
